# Supplementary material for: Functional Mapping of Transcription Factor Grf10 That Regulates Adenine-Responsive and Filamentation Genes in Candida albicans
Source: mSphere. 2018 Oct 24;3(5):e00467-18. doi: 10.1128/mSphere.00467-18 (PMC6200990; doi:10.1128/mSphere.00467-18)
Supplement: FIG S2 [file sph005182666sf2.pdf]

AD1

AD2

pos.: **345-382** *Glutamine-rich region*  
raw-score = **74** *profile.*  
N-score = **11.065**  
E-value = **0.00018**

[illegible]
