# Supplementary material for: Functional Mapping of Transcription Factor Grf10 That Regulates Adenine-Responsive and Filamentation Genes in Candida albicans
Source: PubMed Central journal article supplement (PMC6200990; doi:10.1128/msphere.00467-18), 2018-10-24

**A.**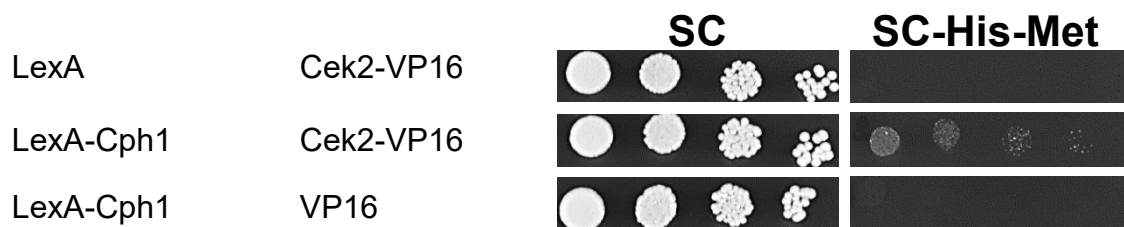**B.**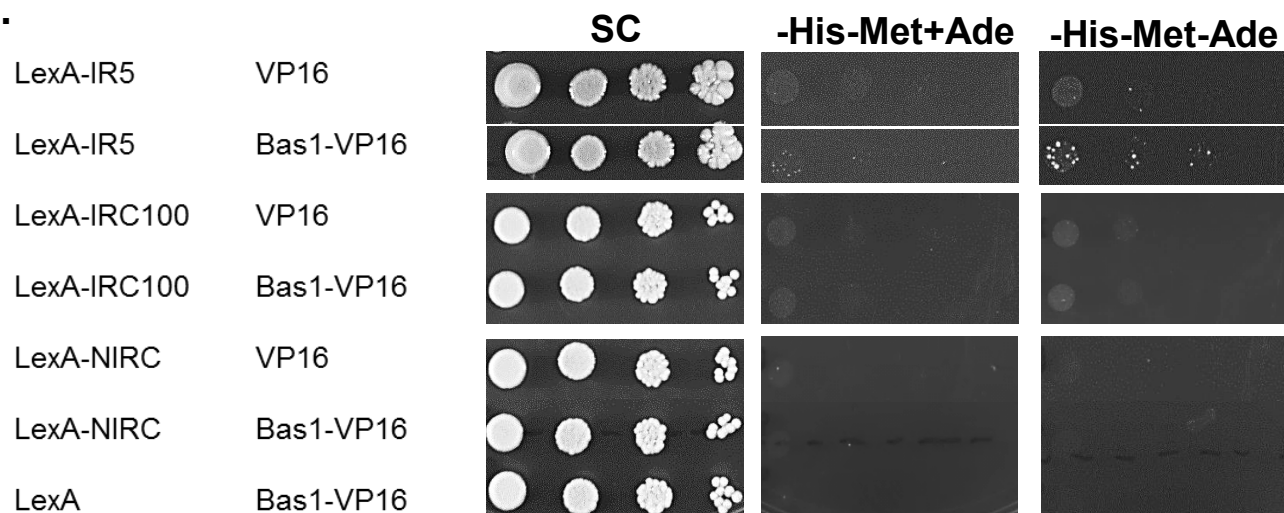**C.**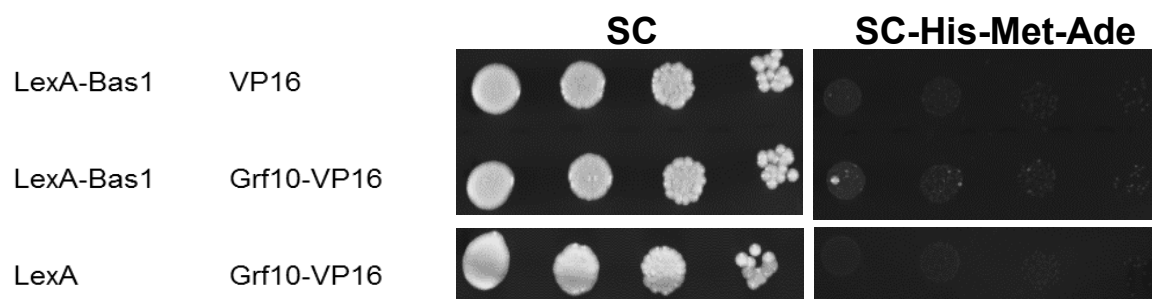

Supplement: sph005182666sf3.pdf [file sph005182666sf3.pdf]
