# Supplementary material for: Functional Mapping of Transcription Factor Grf10 That Regulates Adenine-Responsive and Filamentation Genes in Candida albicans
Source: PubMed Central journal article supplement (PMC6200990; doi:10.1128/msphere.00467-18), 2018-10-24

**Locus**

*BAS1*

*ARG4*

LexA

VP16

Low expression

High expression

SC

-His

-His-Ade

-His-Met

-His-Met-Ade

+/+

$\Delta/\Delta$

LexA

VP16

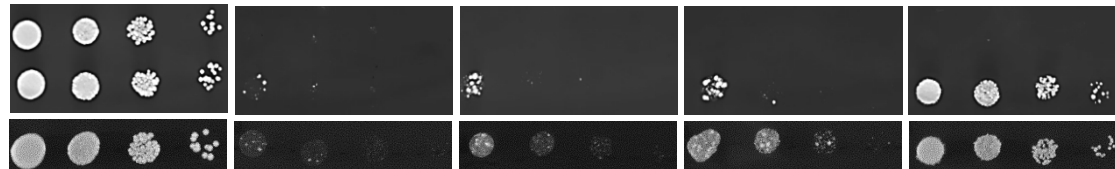

+/+

$\Delta/\Delta$

LexA-Grf10

VP16, *ARG4*

+/+

$\Delta/\Delta$

LexA-Grf10

+/ $\Delta$ ::*ARG4*

$\Delta/\Delta$

LexA

+/ $\Delta$ ::*ARG4*

$\Delta/\Delta$

LexA-Grf10

+/ $\Delta$ ::*ARG4*::*BAS1*

$\Delta/\Delta$

LexA-Grf10

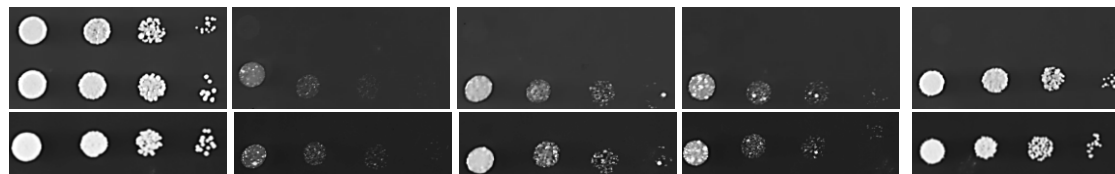

Supplement: sph005182666sf4.pdf [file sph005182666sf4.pdf]
